1  
2 Human Rotavirus Diarrhea Is Associated with Altered Trafficking and Expression of  
3 Apical Membrane Transport Proteins  
4

5 Nicholas C. Zachos<sup>1\*</sup>, Nicholas W. Baetz<sup>1</sup>, Akshita Gupta<sup>1</sup>, Anirudh Kapoor<sup>1</sup>, Robert N. Cole<sup>2</sup>,  
6 Alan S. Verkman<sup>3</sup>, Jerrold R. Turner<sup>4,5</sup>, Mary K. Estes<sup>5</sup>, Mark Donowitz<sup>1,7</sup>  
7

8 <sup>1</sup> Department of Medicine, Division of Gastroenterology and Hepatology, Johns Hopkins  
9 University School of Medicine, Baltimore, MD

10 <sup>2</sup> Department of Biological Chemistry, Johns Hopkins University School of Medicine, Baltimore,  
11 MD

12 <sup>3</sup> Departments of Medicine and Physiology, University of California, San Francisco, San  
13 Francisco, CA

14 <sup>4</sup> Department of Pathology, University of Chicago School of Medicine, Chicago, IL

15 <sup>5</sup> Department of Pathology, Brigham and Women's Hospital and Harvard Medical School,  
16 Boston, Massachusetts

17 <sup>6</sup> Department of Molecular Virology and Microbiology, Baylor College of Medicine, Houston, TX

18 <sup>7</sup> Department of Physiology, Johns Hopkins University School of Medicine, Baltimore, MD  
19

20 \* *To whom correspondence should be addressed:* Nicholas Zachos, 720 Rutland Avenue, 943  
21 Ross Research Building, Johns Hopkins University School of Medicine, Baltimore, MD 21205;  
22 (410) 614-0128; nzachos1@jhmi.edu  
23  
24

25 **ABSTRACT:**

26 **Background:** Rotavirus (RV) is the 5<sup>th</sup> leading cause of death in children <5 years old but the  
27 leading cause of diarrhea related deaths in this age group. The mechanism of RV diarrhea  
28 involves decreased activity of Na<sup>+</sup>-dependent solute transporters with increased luminal  
29 secretion of Cl<sup>-</sup> in the absence of significant histologic damage. While our understanding of RV  
30 diarrhea has come from studies in animal models and cancer cell lines, the mechanism of the  
31 diarrhea and the transport proteins affected in human RV disease remains only partially  
32 understood. This understanding is likely to impact drug development therapy for RV diarrhea.

33 **Methods:** Formalin-fixed paraffin-embedded small intestinal specimens from patients diagnosed  
34 with RV diarrhea (confirmed by anti-RV antibodies) were analyzed by immunofluorescence for  
35 changes in apical/basolateral ion/nutrient transporters/channels as well as tight junctional and  
36 cytoskeletal proteins. Proximal small intestinal enteroids generated from biopsies obtained from

37 healthy human subjects were grown as monolayers, differentiated to resemble villus epithelial  
38 cells, and infected with human RV.  
39 Results: RV diarrhea was associated with reduced expression and intracellular localization of  
40 transport proteins normally found in the brush border membranes, including SGLT1, NHE3,  
41 NHE2, the Na<sup>+</sup>-dependent amino acid transporter SLC6A19, and CFTR. In contrast, basolateral  
42 proteins, including Na<sup>+</sup>/K<sup>+</sup>-ATPase, NKCC1, and β-catenin, the brush border marker ezrin, as  
43 well as the tight junction protein, ZO-1, were expressed and localized normally. RV-induced  
44 mislocalization of NHE3, SGLT1, SLC6A19 and CFTR was also seen when human small  
45 intestinal enteroids were infected with RV.  
46 Conclusions: These data demonstrate a new pathophysiologic mechanism of acute diarrhea in  
47 which expression of multiple apical transport proteins are reduced. This acute diarrhea is likely  
48 to be caused by an effect on a common apical trafficking pathway, as exemplified by RV  
49 diarrhea, and its contribution to other enteric pathogen-induced diarrheal diseases should be  
50 determined.

51

## 52 **INTRODUCTION:**

53 In 2016, Rotavirus was the leading of diarrhea mortality in children <5 years old, causing  
54 ~128,000 deaths, as well as the leading cause of overall diarrhea mortality worldwide, causing  
55 ~228,000 deaths<sup>1</sup>. The markedly reduced efficacy of oral RV vaccines in developing countries  
56 (39-49%), relative to the United States (90%), is one reason why overall RV-associated  
57 childhood death has fallen by only ~3%<sup>2,3</sup>. Oral rehydration solution (ORS) can be effective in  
58 RV diarrhea, but is used in <50% of cases. New approaches to RV diarrhea protection and  
59 therapy are, therefore, desperately needed.

60

61 RV preferentially infects differentiated enterocytes and enteroendocrine cells of the small  
62 intestine to induce a self-limiting, non-inflammatory diarrhea. The mechanisms identified as

63 being involved in acute RV diarrhea include malabsorption, due to decreased enterocyte  
64 absorption, and increased fluid secretion induced by the RV enterotoxin, NSP4<sup>4-6</sup>. NSP4 is a  
65 virus-encoded ion channel that depletes Ca<sup>2+</sup> from the ER of infected cells leading to stimulation  
66 of store operated Ca<sup>2+</sup> entry to sustain elevated levels of intracellular Ca<sup>2+</sup> that is critical for RV  
67 replication. RV transiently stimulates Cl<sup>-</sup> secretion and since RV diarrhea occurs in models of  
68 cystic fibrosis, the Cl<sup>-</sup> channel involved is unlikely to be CFTR<sup>7</sup>. Moreover, in a mouse model of  
69 RV diarrhea, a Ca<sup>2+</sup> activated Cl<sup>-</sup> channel inhibitor prevented RV diarrhea<sup>8</sup>. Activity of Na<sup>+</sup>-  
70 solute cotransporters, such as SGLT1, and the Na<sup>+</sup>/H<sup>+</sup> exchanger, NHE3, are also reduced in  
71 RV<sup>9,10</sup>. Whether a common mechanism explains the changes in so many apical transport  
72 processes is not known. Despite studies using human colon cancer-derived cell lines and  
73 animal intestines (e.g. mice, rats, cats), there are no detailed studies using intestinal tissues  
74 from patients documented to have RV diarrhea. We and others have demonstrated that RV  
75 pathogenesis can be studied using human enteroids, which are self-propagating primary  
76 cultures of normal human small intestinal epithelium derived from intestinal stem cells obtained  
77 from healthy donors<sup>11</sup>.

78

79 In this report, we analyzed pathology specimens of intestine from patients with documented RV  
80 diarrhea to describe a new mechanism for RV diarrhea that explains many of the previously  
81 reported effects on intestinal transport. We also demonstrate that a similar phenotype occurs in  
82 RV infected human enteroids, supporting future pathophysiologic studies in human enteroids  
83 and identifying a model to use for development of anti-RV diarrheal drugs.

84

## 85 **METHODS:**

86 **Identification of intestinal pathology specimens of cases of rotaviral diarrhea:** A text for  
87 the term “rotaviral diarrhea” was applied to the University of Chicago Department of Pathology  
88 records, and formalin-fixed, paraffin-embedded (FFPE) intestinal biopsies were obtained.

89 Similar numbers of disease-free biopsies from age (ages 2-22) and sex matched controls  
90 processed contemporaneously with the RV specimens were collected to serve as controls for  
91 processing and storage effects.

92

93 **Antibodies:** Rabbit polyclonal RV antibodies against outer capsid protein, VP6 (1:50 dilution)  
94 and RV enterotoxin, NSP4 (1:100 dilution), have been previously described <sup>4</sup>. Rabbit polyclonal  
95 antibody to: NHE3 (SLC9A3) was from Novus Biologicals (Cat #: NBP1-82574); NHE2  
96 (SLC9A2) <sup>14</sup>; B<sup>o</sup>AT1 (SLC6A19) was from Sigma (Cat #: HPA043207); zonula occludins 1 (ZO-  
97 1) was from Invitrogen (Cat #: 33-9100); and  $\beta$ -catenin were from R&D Systems. Mouse  
98 monoclonal antibodies to: CFTR (clone M3A7; Cat #: 05-583) and SGLT-1 (Cat #: 07-1417)  
99 were from Millipore; NKCC1 (SLC12A2; Cat #: T4) and Na<sup>+</sup>/K<sup>+</sup>-ATPase (Cat #: a5) were from  
100 the University of Iowa Developmental Studies Hybridoma Bank. Rabbit monoclonal anti-  
101 phospho-ezrin (p-T567) was from Abcam (Cat #: EP2122Y).

102

103 **Human Rotavirus:** Human RV strain, Ito, was replicated in MA104 cells, purified, and infected  
104 in human enteroids as previously described <sup>11</sup>.

105

106 **Human enteroids:**

107 Human duodenal and jejunal enteroids were each established from four healthy donors (ages 2-  
108 22) obtained via endoscopic or surgical procedures utilizing the methods developed by the  
109 Clevers laboratory <sup>15</sup>. De-identified biopsy tissue was obtained from healthy subjects who  
110 provided informed consent at Johns Hopkins University and all methods were carried out in  
111 accordance with approved guidelines and regulations. All experimental protocols were approved  
112 by the Johns Hopkins University Institutional Review Board (IRB#: NA\_00038329 and  
113 IRB00044373). Briefly, enteroids generated from isolated intestinal crypts <sup>16</sup> were maintained as  
114 cysts embedded in Matrigel (Corning, USA) in non-differentiation media (NDM) containing

115 Wnt3A, R-spondin-1, noggin and EGF, as we have described previously<sup>17</sup>. Enteroid  
116 monolayers were generated as previously described in detail<sup>17,18</sup>. Monolayer differentiation  
117 was induced by incubation in Wnt3A-free<sup>20</sup> and Rspo-1-free DFM for five days<sup>17</sup>. Monolayer  
118 confluency and differentiation were monitored by measuring TER with an ohmmeter (EVOM<sup>2</sup>;  
119 World Precision Instruments, USA). The unit area resistances (ohm-cm<sup>-2</sup>) were calculated  
120 considering Transwell surface area (0.33 cm<sup>2</sup>)<sup>17,18</sup>.

121 **Immunofluorescence confocal microscopy:** FFPE blocks were sectioned to 5µm and  
122 rehydrated through an ethanol gradient prior to microwave antigen retrieval in 10mM sodium  
123 citrate (pH 6.0). For enteroids, monolayers were fixed in 2% paraformaldehyde in PBS for 30  
124 minutes. Sections and monolayers were blocked and permeabilized in PBS containing 2%  
125 BSA, 15% FBS, and 0.1% saponin for 1 hour and then washed three times in PBS. Primary  
126 antibodies (1:100 dilution) in PBS were incubated overnight at 4°C followed by three PBS  
127 washes. Cells were then incubated with anti-mouse or anti-rabbit AlexaFluor (488nm or 568nm)  
128 conjugated secondary antibodies (diluted 1:100) and Hoescht 33342 (nuclear counterstain) in  
129 PBS for 1 hour at room temperature. Tissue sections and enteroid monolayers were washed in  
130 PBS, mounted, and coverslipped. Confocal images were obtained on Zeiss 510 META confocal  
131 microscope. The Atlas of Intestinal Transport ([https://www.jrturnerlab.com/  
132 atlasofintestinaltransport](https://www.jrturnerlab.com/atlasofintestinaltransport)) was used to assess localization of specific transport proteins in small  
133 intestinal segments from human subjects.

134

135 **LC-MS/MS analysis** Peptides in 28 fractions after basic reverse phase (bRP) fractionation,  
136 dried, 8.57ug/fraction, were re-constituted in 12uL 2%ACN/0.1%FA and 6uL, ~4.25ug (50%)  
137 analyzed by liquid chromatography/tandem mass spectrometry (LC-MS/MS) in FTFT using  
138 QExactive Plus (Thermo Fisher Scientific) interfaced with nano-Acquity LC system from Waters.  
139 Peptides were loaded on a 75 µm x 2.5 cm C18 (YMC\*GEL ODS-A 12nm S-10 µm) trap at

140 600nl/min 0.1% FA (solvent A) and fractionated at 300 nL/min on a 75  $\mu$ m x 100 mm ProntoSil  
141 C18H reverse-phase column (5  $\mu$ m, 120Å, [http://www.bischoff-chrom.com/hplc-prontosil-c18-h-](http://www.bischoff-chrom.com/hplc-prontosil-c18-h-c18-phasen.html)  
142 [c18-phasen.html](http://www.bischoff-chrom.com/hplc-prontosil-c18-h-c18-phasen.html)) using a 2-10% solvent B (90% acetonitrile in 0.1% formic acid) gradient over  
143 first 2min, then up to 25% B by 55min, 45% B by 67 min and 100% B by 75min. Eluting peptides  
144 were sprayed into an LTQ Orbitrap Velos mass spectrometer through 1  $\mu$ m emitter tip (New  
145 Objective, [www.newobjective.com](http://www.newobjective.com)) at 2.4 kV. Survey scans (full ms) were acquired on Orbi-trap  
146 within 350-1800Da m/z using Data-dependent Top 12 method with dynamic exclusion of 30 s.  
147 Precursor ions were individually isolated with 1.2Da, fragmented (MS/MS) using HCD activation  
148 collision energy 30. Precursor and the fragment ions were analyzed at resolution (at 200Da)  
149 70,000 and 35000, respectively.

150 **Data Analysis:** MS/MS spectra were analyzed via Proteome Discoverer software (v1.4  
151 ThermoFisher Scientific) using 3Nodes (extracted, processed by MS2Processor and PD1.3),  
152 with Mascot (v 2.5,1 Matrix Science, London, UK) using the RefSeq2015 Complete Database  
153 with concatenated decoy database specifying human species, Trypsin/P as enzyme, missed  
154 cleavage 2, fixed modifications TMT10-plex on N-termini and carbamidomethylation on  
155 cysteine, and variable modifications include TMT 10plex labeling of lysines, oxidation of  
156 methionine and deamidation on Precursor tolerance 12ppm, fragment tolerance 0.03Da, extract  
157 resolution 55K at 400Da. NQ. Peptide identifications from Mascot searches were processed  
158 within the Proteome Discoverer to identify peptides with a confidence threshold 0.01% False  
159 Discovery Rate, based on a concatenated decoy database search and to calculate the protein  
160 and peptide ratios.

161 **Grant Support:**

162 The current study was funded by NIH grants: R24-DK099803 (MD), R01-AI080656 (ME), R01-  
163 DK026523 (MD), P30-DK089502 (MD, NZ), R03-DK091482 (NZ), P30-DK72517 (AV), and R01-  
164 DK061931 (JRT).

165

166 Funding source NIH grants had no influence in study design, analysis, data interpretation or  
167 writing of the manuscript.

168

169 **RESULTS:**

170 **Validation of RV infection in pathology specimens:** Cases previously diagnosed as rotaviral  
171 diarrhea and controls were analyzed by immunofluorescence confocal microscopy. Of 17 cases  
172 initially categorized as RV diarrhea, 12 cases were confirmed positive for rotaviral infection on  
173 the basis of immunofluorescent staining for both VP6 and NSP4. Neither protein was detected  
174 in any of the the healthy controls (**Fig 1**). These 12 cases were studied further.

175

176 **RV diarrhea is associated with altered localization and/or expression of brush border**  
177 **ion/nutrient transporters and channels:** Immunofluorescence confocal microscopy revealed  
178 major differences in brush border/apical transport proteins exhibiting mislocalization away from  
179 the brush border as well as reduced expression in RV specimens compared to healthy controls.  
180 This was true of NHE2, NHE3, CFTR, SGLT1, and B<sup>o</sup>AT1 (SLC6A19) (**Fig 2A, B and Table 1**).  
181 SGLT1 localization was subapical while CFTR, NHE2 and SLC6A19 were redistributed towards  
182 the basolateral pole of epithelial cells. The overall expression of NHE3 in enterocytes was  
183 nearly lost. In some cases, expression of NHE2, SGLT1 or CFTR could also not be detected  
184 (**Fig 2A**). In order to confirm that these changes were not due to general structural changes in  
185 the brush border, which appeared normal by histologic analysis, we examined expression and  
186 localization of phosphorylated (T567) ezrin (i.e. p-ezrin), a brush border structural protein, as  
187 well as tight junction (TJ) markers ZO1 and occludin. The location and magnitude of p-ezrin  
188 and ZO-1 expression were not affected rotavirus infection, relative to healthy controls (**Fig 3,**  
189 **Table 1**). To consider whether there was a general abnormality of transport protein expression  
190 or localization, the basolateral transport proteins NKCC1 and Na<sup>+</sup>/K<sup>+</sup>-ATPase as well as β-

191 catenin (data not shown) were studied. No changes in these proteins were identified (**Figs 3, 4,**  
192 **Table 1**). Thus, RV specifically impairs the apical expression of multiple small intestinal ion and  
193 nutrient transporters and channels without affecting basolateral transporters or brush border and  
194 TJ structural proteins.

195

### 196 **Mislocalization or downregulation of apical transporters present in other diarrhea**

197 **diseases.** In addition to profiling the expression and localization of intestinal  
198 transporters/channels and tight junctional proteins in healthy subjects, The Atlas of Intestinal  
199 Transport is also comprised of FFPE tissues sections obtained from healthy subjects and  
200 patients with various types of intestinal disorders that have diarrhea as a common symptom.  
201 Using this Atlas, we analyzed whether RV-mediated changes in the expression of apical  
202 transporters also occur in other types of diarrheal disease. Examination of tissue sections from  
203 some patients with villous atrophy or common variable immunodeficiency revealed decreased  
204 expression of NHE3 and/or partial mislocalization of CFTR and SGLT-1. Similar to RV patient  
205 specimens and healthy controls, the expression and localization of ZO-1 appeared normal as  
206 did the basolateral marker, E-cadherin. These findings support the hypothesis that some  
207 diarrheal diseases, in addition to acute RV diarrhea, are associated with altered  
208 expression/localization of apical transport proteins.

209

### 210 **Infection of human enteroids with human RV strain recapitulates the changes in brush**

211 **border/apical domain localization of multiple transport proteins:** Human RV strains can  
212 infect adult intestinal crypt-derived enteroids from each segment of human small intestine as  
213 well as replicate over at least 96h as detected by quantitation of increasing viral RNA by qRT-  
214 PCR, virus-specific protein expression by Western blot analysis, and production of infectious  
215 virus by fluorescent focus assays<sup>11</sup>. Laboratory strains of human RV as well as human clinical  
216 isolates can replicate in enteroids, which subsequently produce infectious rotavirus<sup>11</sup>. Whether



217 RV infection of differentiated (5 days after Wnt3A, R-spondin-1 removal) human small intestinal  
218 enteroids altered apical transporter expression or localization was determined by exposure to  
219 human RV with mock infected enteroids as negative controls, as described previously<sup>11</sup>. The  
220 conditions studied were associated with RV infection (~40% infected cells similar to previously  
221 shown<sup>11</sup>) as indicated by presence of virus visualized by transmission electron microscopy  
222 within 1 hour post infection (**Fig 5**). Monolayers were fixed at multiple times after RV infection  
223 (1,6,24h) and immunostained with the same antibodies against intestinal transporters used to  
224 analyze RV patient specimens. **Figures 6 and 7** demonstrate by immunofluorescence confocal  
225 microscopy that RV infection reduced the surface expression of CFTR, NHE3, and SGLT-1  
226 similarly to that observed in patient samples. At 6 hours post infection, CFTR was miss-localized  
227 to the basolateral membrane compared to mock infected controls in which CFTR was  
228 exclusively localized to the apical domain (**Fig 6**). By 24 hours post infection, SGLT-1 and  
229 NHE3, which are normally expressed in the apical membrane of mock infected enteroid  
230 monolayers, exhibited increased expression in the cytosol below the apical membrane, with  
231 NHE3 expression markedly reduced (**Fig 7**). These results demonstrate that effects of human  
232 RV infection on the surface expression of apical ion/nutrient transporters in human small  
233 intestinal enteroids mimics changes in clinical cases of RV infection.

234

235 **Altered expression and localization of apical ion/nutrient transporters is associated with**  
236 **decreased expression of proteins associated with apical endosome sorting and/or**  
237 **recycling:** In order to characterize changes in protein trafficking due to RV infection, we  
238 performed quantitative proteomics on human small intestinal enteroid monolayers mock or RV  
239 infected for 1-48 hours. As summarized in **Table 2**, RV significantly downregulated expression  
240 of multiple apical trafficking proteins including the apical cargo trafficking motor protein, myosin  
241 Vb, and Ras associated binding (Rab) proteins, and associated binding partners that regulate  
242 cargo trafficking via the apical endosome.

243

244 **DISCUSSION:**

245           The findings of this study define the impact of RV infection on the expression and  
246 localization of the major intestinal epithelial ion/nutrient transporters/channels in human  
247 intestinal tissue. We observed that multiple apical transport proteins, including Na<sup>+</sup>-dependent  
248 ion/solute transporters and the major intestinal chloride secretory channel, CFTR, are either  
249 mislocalized and, in some cases, downregulated in the small intestine of patients with RV  
250 diarrhea when compared to specimens from healthy subjects. These changes in  
251 expression/localization appeared to be specific for apical transporters/channels since  
252 basolateral transporters, as well as tight junctional proteins, were normally distributed in RV  
253 patient specimens. Moreover, the changes observed in clinical specimens can be reproduced  
254 in a primary human *in vitro* epithelial culture system (i.e. enteroids). Due to the specific effects  
255 of RV infection on apical transporters, our data suggest that a common apical trafficking  
256 pathway shared by multiple transporters/channels may be the mechanism responsible for RV  
257 diarrhea.

258

259 Previous studies of RV diarrhea have separately addressed RV effects on individual  
260 transporters. Together, these data have suggested the RV diarrhea occurs due to increased Cl<sup>-</sup>  
261 secretion and defective Na<sup>+</sup> absorption. The results of our study unify previous findings by  
262 examining how RV alters the expression/localization of multiple transporters in human enteroids  
263 and comparing these phenotypes to clinical specimens from RV infected patients. Here we  
264 show that RV diarrhea appears to be due to mild changes in the brush border, seen by EM but  
265 not by light microscopy and not associated with changes in expression of the brush border  
266 protein p-ezrin or the tight junction protein ZO-1, plus abnormal apical membrane trafficking of  
267 transport proteins. The abnormal trafficking of the proteins identified in this study, would  
268 account for the documented reduced Na<sup>+</sup> and glucose absorption (reduced apical SGLT1,

269 NHE3), occurrence of diarrhea in CF models (CFTR not apically localized), and ability of the  
270 calcium activated Cl<sup>-</sup> channel inhibitor<sup>8</sup> to totally prevent RV diarrhea in a neonatal mouse  
271 model. However, the calcium activated Cl<sup>-</sup> channel involved in small intestinal secretion has not  
272 been identified molecularly. Consequently, we cannot determine if that protein is also  
273 mislocalized or down-regulated; although, the results suggest it is trafficked differently than the  
274 affected proteins. The fact that ORS is marginally effective in rehydrating patients with RV  
275 diarrhea is at least partially explained by the fact that RV infection reduces the overall amount of  
276 transporters that could respond to ORS. However, the fact that ORS saves lives in RV diarrhea  
277 speaks for the fact that the transport processes involved in ORS related rehydration (SGLT1,  
278 NHE3, Na<sup>+</sup>/K<sup>+</sup>-ATPase) are still at least partially functional, which is consistent with the previous  
279 documentation of patchy histologic changes in small intestine of RV diarrhea.

280

281 The current report potentially identifies a previously unrecognized mechanism of diarrhea that  
282 might be relevant for additional difficult to treat diarrheas; however, the precise mechanism  
283 involved abnormal apical trafficking remains to be determined. To support the hypothesis that  
284 apical trafficking is the general mechanism responsible, we identified a panel of apical  
285 endosome associated proteins that are significantly downregulated following RV infection in  
286 human enteroids (Table 2) and have known regulatory effects on apical transporters. Future  
287 studies will be necessary to demonstrate that a loss of these proteins can phenocopy the  
288 expression and/or localization of changes observed after RV infection. In a parallel report  
289 [Maeda and Zachos et al], we described that RV infection of intestinal epithelial cells was  
290 associated with reduced expression of PARD6B, a protein known to be involved in apical  
291 recycling<sup>19</sup>. This RV effect was associated with increased proteasomal degradation of  
292 PARD6B as well as atypical PKC, which is part of the PARD6B polarity complex. Moreover,  
293 gene suppression of PARD6B expression in MDCK, Caco-2 cells, and human enteroids  
294 disrupted apical endosomal trafficking and altered expression of apical membrane transport

295 proteins, similar to what we observed in RV patient specimens. It is not known whether these  
296 RV effects account for the reduced expression of apical transport proteins demonstrated in the  
297 human pathology specimens. Taken together, both studies suggest that RV mediates the  
298 altered expression and localization of apical ion/nutrient transporters by affecting components of  
299 the apical endosome. These results may be potentially important for directing development of  
300 medical management of acute rotaviral diarrhea, since developing drugs to stimulate NHE3 or  
301 inhibit CFTR, which are the commonly suggested targets of anti-diarrheal drug development,  
302 are not likely to be successful.

303

304 Importantly, the reproduction in human enteroids of the RV effects on apical trafficking and  
305 transport protein expression in the human disease provides a model for additional mechanistic  
306 studies and potential drug development to treat RV diarrhea. We recently established the  
307 methodology to grow human enteroids as confluent 2D monolayers to generate a controllable  
308 and tractable model to study luminal host-pathogen interactions and standardized this model to  
309 allow separate study of a “villus”-like epithelium (differentiated enteroids) and “crypt”-like  
310 epithelium (undifferentiated enteroids)<sup>17,18</sup>. Furthermore, we showed that RV preferentially  
311 targets differentiated enteroids, which is consistent with the previous recognition that RV  
312 preferentially infects villus tip enterocytes<sup>20</sup>. We further established that human enteroids  
313 demonstrate intracellular changes typical of RV replication in cultured cells, including  
314 visualization of nascent virus particles within intracellular vesicles by electron microscopy  
315 (Figure 4), some microvillar damage, the induction of lipid droplets, and formation of replication  
316 compartments<sup>11</sup>.

317

318 While RV is the first diarrheal disease to act by causing a defect in the general apical trafficking  
319 mechanism, it will be important to determine how wide-spread is the contribution of this  
320 mechanism to other diarrheal diseases and to diseases of other epithelia (lung, kidney, brain,

321 etc). Understanding what transport processes are abnormal in diarrheal diseases and the  
322 mechanisms by which the changes occur, provides strategies for drug development in an area  
323 that currently lacks effective treatments.

324

325 **REFERENCES:**

- 326 1. Tate JE, Burton AH, Boschi-Pinto C, Parashar UD; World Health Organization–Coordinated  
327 Global Rotavirus Surveillance Network. Global, Regional, and National Estimates of Rotavirus  
328 Mortality in Children <5 Years of Age, 2000-2013. *Clin Infect Dis*. 2016 May 1;62 Suppl 2:S96-  
329 S105.
- 330 2. Armah GE, Sow SO, Breiman RF, Dallas MJ, Tapia MD, Feikin DR, et al. Efficacy of  
331 pentavalent rotavirus vaccine against severe rotavirus gastroenteritis in infants in developing  
332 countries in sub-Saharan Africa: a randomised, double-blind, placebo-controlled trial. *Lancet*.  
333 2010;376(9741):606-14.
- 334 3. Zaman K, Dang DA, Victor JC, Shin S, Yunus M, Dallas MJ, et al. Efficacy of pentavalent  
335 rotavirus vaccine against severe rotavirus gastroenteritis in infants in developing countries in  
336 Asia: a randomised, double-blind, placebo-controlled trial. *Lancet*. 2010;376(9741):615-23.
- 337 4. Ball JM, Tian P, Zeng CQ, Morris AP, Estes MK. Age-dependent diarrhea induced by a  
338 rotaviral nonstructural glycoprotein. *Science*. 1986; 272: 101-104.
- 339 5. Halaihel N, Lievin V, Alvarado F, Vasseur M. Rotavirus infection impairs intestinal brush-  
340 border membrane Na(+)-solute cotransport activities in young rabbits. *Am J Physiol*  
341 *Gastrointest Liver Physiol*. 2000;279(3):G587-96.
- 342 6. Halaihel N, Lievin V, Ball JM, Estes MK, Alvarado F, Vasseur M. Direct inhibitory effect of  
343 rotavirus NSP4(114-135) peptide on the Na(+)-D-glucose symporter of rabbit intestinal brush  
344 border membrane. *J Virol*. 2000;74(20):9464-70. PMID: 112375.
- 345 7. Morris AP, Scott JK, Ball JM, Zeng CQ, O'Neal WK, Estes MK. NSP4 elicits age-dependent  
346 diarrhea and Ca(2+)mediated I(-) influx into intestinal crypts of CF mice. *Am J Physiol*.  
347 1999;277(2 Pt 1):G431-44.
- 348 8. Ko EA, Jin BJ, Namkung W, Ma T, Thiagarajah JR, Verkman AS. Chloride channel inhibition  
349 by a red wine extract and a synthetic small molecule prevents rotaviral secretory diarrhoea in  
350 neonatal mice. *Gut*. 2014;63(7):1120-9.
- 351 9. Foulke-Abel J, In J, Kovbasnjuk O, Zachos NC, Ettayebi K, Blutt SE, et al. Human enteroids  
352 as an ex-vivo model of host-pathogen interactions in the gastrointestinal tract. *Exp Biol Med*  
353 (Maywood). 2014;239(9):1124-34.
- 354 10. Zou WY, Blutt SE, Zeng XL, Chen MS, Lo YH, Castillo-Azofeifa D, Klein OD, Shroyer NF,  
355 Donowitz M, Estes MK. Epithelial WNT Ligands Are Essential Drivers of Intestinal Stem Cell  
356 Activation. *Cell Rep*. 2018 Jan 23;22(4):1003-1015.
- 357 11. Saxena K, Blutt SE, Ettayebi K, Zeng X-L, Broughman JR, Crawford SE, Karandikar U,  
358 Sastri NP, Conner ME, Opekun A, Graham DY, Foulke-Abel J, In J, Kovbasnjuk O, Zachos  
359 NC, Donowitz M, Estes MK. Human intestinal enteroids: a new model to study human  
360 rotavirus infection, host restriction and pathophysiology. *Journal of Virology*. 2015; 90(1):  
361 43-56.
- 362 12. Blutt SE, Matson DO, Crawford SE, Staat MA, Azimi P, Bennett BL, Piedra PA, Conner  
363 ME. Rotavirus antigenemia in children is associated with viremia. *PLoS Med*. 2007; 4: e121.
- 364 13. Sastri NP, Viskoyska M, Hyser JM, Tanner MR, Horton LB, Sankaran B, Prasad BV, Estes  
365 MK. Structural plasticity of the coiled-coil domain of rotavirus NSP4. *J Virol*. 2014; 88:13602-  
366 13612.

- 367 14. Hoogerwerf WA, Tsao SC, Devuyst O, Levine SA, Yun CH, Yip JW, Cohen ME, Wilson PD,  
368 Lazenby AJ, Tse CM, Donowitz M. NHE2 and NHE3 are human and rabbit intestinal brush-  
369 border proteins. *Am J Physiol.* 1996 Jan;270(1 Pt 1):G29-41.
- 370 15. Sato T, Vries RG, Snippert HJ, van de Wetering M, Barker N, Stange DE, et al. Single Lgr5  
371 stem cells build crypt-villus structures in vitro without a mesenchymal niche. *Nature.*  
372 2009;459(7244):262-5.
- 373 16. Sato T, Stange DE, Ferrante M, Vries RG, Van Es JH, Van den Brink S, Van Houdt WJ,  
374 Pronk A, Van Gorp J, Siersema PD, Clevers H. Long-term expansion of epithelial organoids  
375 from human colon, adenoma, adenocarcinoma, and Barrett's epithelium.  
376 *Gastroenterology.* 2011 Nov;141(5):1762-72.
- 377 17. Noel GN, Baetz NW, Staab JF, Donowitz M, Kovbasnjuk O, Pasetti M, Zachos NC. A primary  
378 human macrophage-enteroid co-culture model to investigate mucosal gut physiology and  
379 host-pathogen interactions. *Nature Scientific Reports.* 2017; 7: 45270.
- 380 18. In J, Foulke-Abel J, Zachos NC, Hansen AM, Kaper JB, Bernstein HD, et al.  
381 Enterohemorrhagic reduce mucus and intermicrovillar bridges in human stem cell-derived  
382 colonoids. *Cell Mol Gastroenterol Hepatol.* 2016;2(1):48-62 e3. PMID: 4740923.
- 383 19. Nelms B, Dalomba NF, Lencer W. A targeted RNAi screen identifies factors affecting diverse  
384 stages of receptor-mediated transcytosis. *J Cell Biol.* 2017 Feb;216(2):511-525.
- 385 20. Greenberg HB, Estes MK. Rotaviruses: from pathogenesis to vaccination. *Gastroenterology.*  
386 2009;136(6):1939-51.

387

388

389

390

391

392

393

394

395

396

397

398

399

400

401

402

403

404

405

406

407

408

409

410 **TABLE 1: Summary of RV effects on intestinal transporters in RV infected patient**  
411 **specimens**

| <b>Antibody</b>                            | <b>Normal presentation</b> | <b>Expression/Localization</b>    |
|--------------------------------------------|----------------------------|-----------------------------------|
| <b>CFTR</b>                                | <b>0/12</b>                | <b>Downregulated/BLM</b>          |
| <b>NHE2</b>                                | <b>2/12</b>                | <b>Downregulated/Cytosolic</b>    |
| <b>NHE3</b>                                | <b>4/12</b>                | <b>Downregulated/Cytosolic</b>    |
| <b>SGLT1</b>                               | <b>3/12</b>                | <b>Downregulated/Cytosolic</b>    |
| <b>B<sup>0</sup>AT1</b>                    | <b>3/11</b>                | <b>No BB; Basal concentration</b> |
| <b>p-Ezrin</b>                             | <b>12/12</b>               |                                   |
| <b>Na<sup>+</sup>/K<sup>+</sup> ATPase</b> | <b>11/11</b>               |                                   |
| <b>NKCC1</b>                               | <b>11/11</b>               |                                   |

412  
413  
414  
415  
416  
417  
418  
419  
420  
421  
422  
423  
424  
425  
426  
427  
428  
429  
430  
431  
432  
433  
434  
435  
436  
437  
438  
439  
440

441 **TABLE 2: Proteomics analysis of human small intestinal enteroids infected with RV**

| <b>Accession Number</b> | <b>Protein</b>                                                     | <b>P value</b> |
|-------------------------|--------------------------------------------------------------------|----------------|
| <b>214010165</b>        | <b>rab11 family-interacting protein 3 isoform 2 [Homo sapiens]</b> | <b>0.0038</b>  |
| <b>635574573</b>        | <b>ras-related protein Rab-5A isoform 2 [Homo sapiens]</b>         | <b>0.0056</b>  |
| <b>116812567</b>        | <b>ras-related protein Rab-25 [Homo sapiens]</b>                   | <b>0.0014</b>  |
| <b>190358517</b>        | <b>ras-related protein Rab-11B [Homo sapiens]</b>                  | <b>0.0117</b>  |
| <b>122937345</b>        | <b>unconventional myosin-Vb [Homo sapiens]</b>                     | <b>0.0004</b>  |

442  
443  
444  
445  
446  
447  
448  
449  
450  
451  
452  
453  
454  
455  
456  
457  
458  
459  
460  
461  
462  
463  
464  
465  
466  
467  
468  
469  
470  
471  
472



473 **FIGURE LEGENDS:**

474 **FIGURE 1: RV antigen and NSP4 were detected in all human intestinal rotavirus pathology**  
475 **specimens further studied.** Immunofluorescent detection of RV (red) and NSP4 (green) in  
476 pathology specimens of the small intestine from patients documented with RV diarrhea (bottom)  
477 and aged-matched healthy subjects (control; top). RV and NSP4 expressed at the BB and  
478 intracellularly in villus epithelial cells. Scale bar = 20µm.

479  
480 **FIGURE 2: BB localization and expression of apical ion/nutrient transporters is altered in**  
481 **the small intestine of RV patients compared to age-matched healthy subjects.** FFPE patient  
482 small intestinal specimens were immunostained for NHE2 (green), NHE3 (red), CFTR (green),  
483 SGLT1 (green), and B<sup>0</sup>AT1 (red) and images obtained by confocal microscopy. Blue = nuclei.  
484 Scale bar = 20µm.

485  
486 **FIGURE 3: BB localization and expression of phosphorylated ezrin (p-ezrin) is similar in**  
487 **the small intestine of RV patients compared to age-matched healthy subjects.** Small  
488 intestinal specimens from healthy subjects and RV infected patients were immunostained for the  
489 apical cytoskeletal marker, phosphor-ezrin (p-ezrin; T567) and images captured using confocal  
490 microscope. Blue = nuclei. Scale bar = 20µm.

491  
492 **FIGURE 4: Expression and basolateral localization of NKCC1 and Na<sup>+</sup>/K<sup>+</sup> ATPase (each in**  
493 **green on left) and TJ location of ZO1 (red on right) are not affected in RV cases.** All images:  
494 blue = nuclei. Scale bar = 20µm.

495  
496 **Figure 5: RV particles detected in large, non-electron dense, intracellular vesicles in**  
497 **human enteroids.** RV particles (~40-50nm) were observed at 1 hour post infection in intracellular  
498 vesicles ranging from 200nm-1µm in diameter. Microvilli exhibit partial blunting following RV  
499 infection. *Right:* Higher magnification of internalized RV particles from region denoted by white  
500 dash box.

501  
502 **Figure 6: Enteroids mimic CFTR miss-localization in RV patient specimens.** Following RV  
503 infection in human enteroids, monolayers were fixed in 2% PFA and immunostained for CFTR.  
504 Confocal microscopy was used to capture optical sections and the resulting orthogonal planes  
505 are presented with apical membrane at the top of each image. Blue = nuclei.

506  
507 **Figure 7: Enteroids mimic NHE3 and SGLT-1 miss-localization in RV patient specimens.**  
508 Human enteroids infected with RV were fixed after 24 hours and immunostained for NHE3 and  
509 SGLT1 (green). Optical sections were obtained by confocal microscopy and orthogonal images  
510 (below) represent a cross sectional view of enteroid monolayers with the apical membrane at  
511 the top of each image. Blue = nuclei.

512  
513  
514  
515  
516  
517  
518  
519  
520  
521

Figure 1

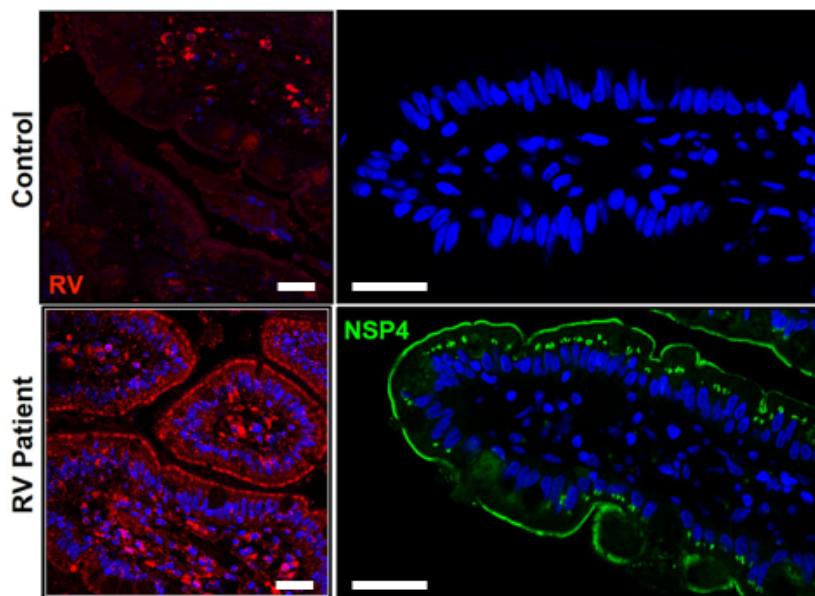

522  
523

524

525

526

527

528

529

530

531

532

533

534

535

536

537

538

539

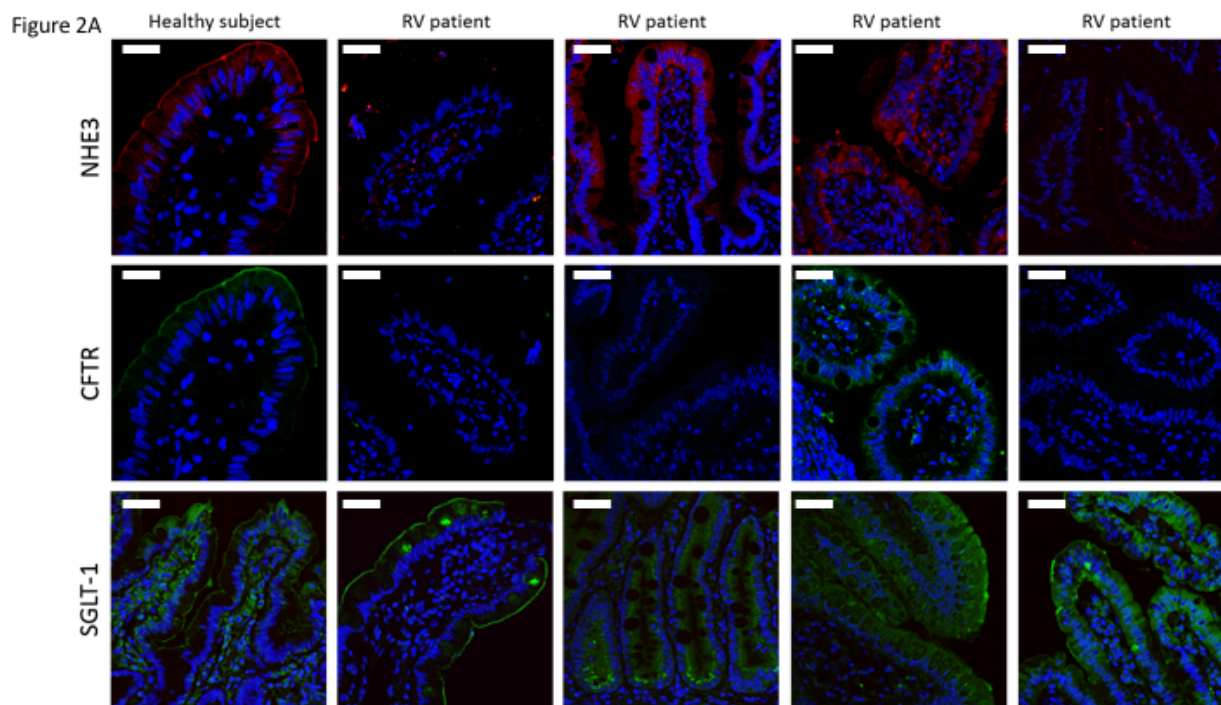

540

541

542

543

544

545

546

547

548

549

550

551

552

553

554

555

556

557

Figure 2B

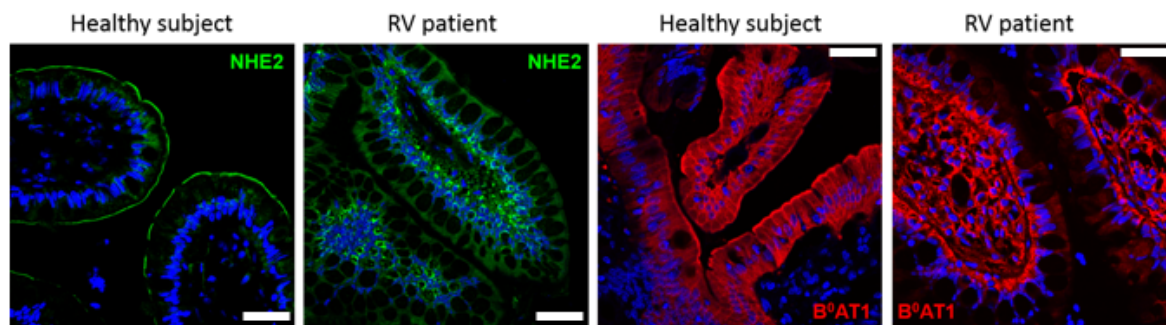

558

559

560

561

562

563

564

565

566

567

568

569

570

571

572

573

574

575

Figure 3

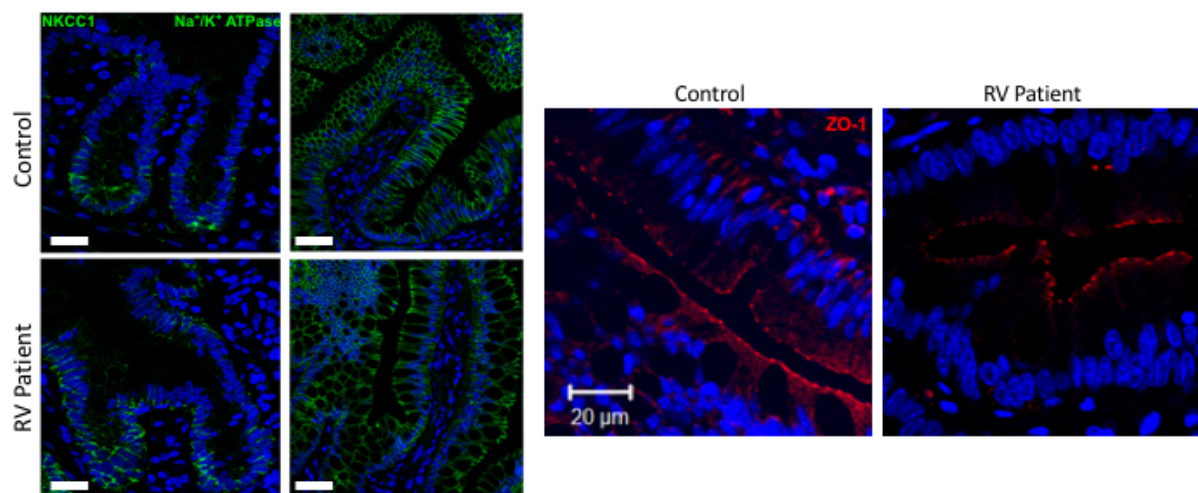

576

577

578

579

580

581

582

583

584

585

586

587

588

589

590

591

592

593

Figure 4

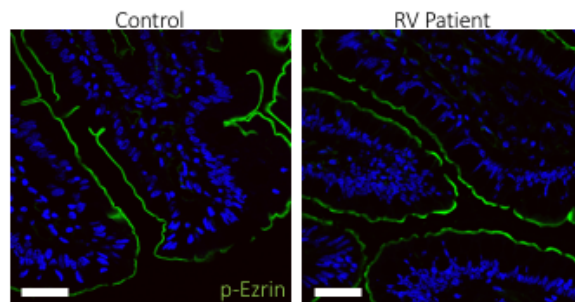

594

595

596

597

598

599

600

601

602

603

604

605

606

607

608

609

610

611

Figure 5

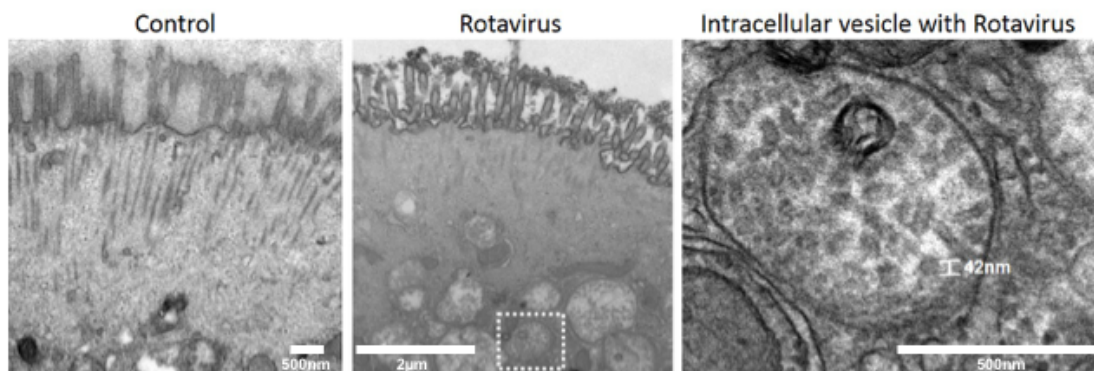

612

613

614

615

616

617

618

619

620

621

622

623

624

625

626

627

628

629



Figure 6

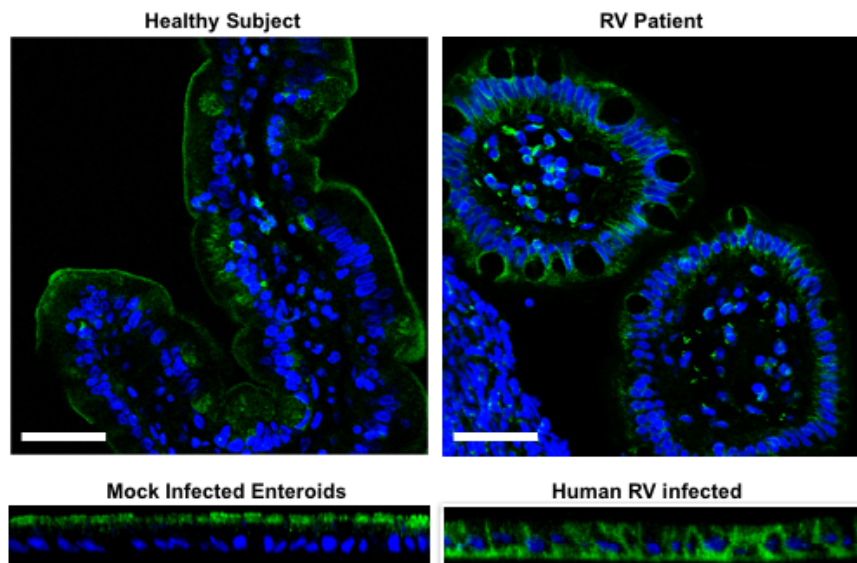

630

631

632

633

634

635

636

637

638

639

640

641

642

643

644

645

646

647



Figure 7

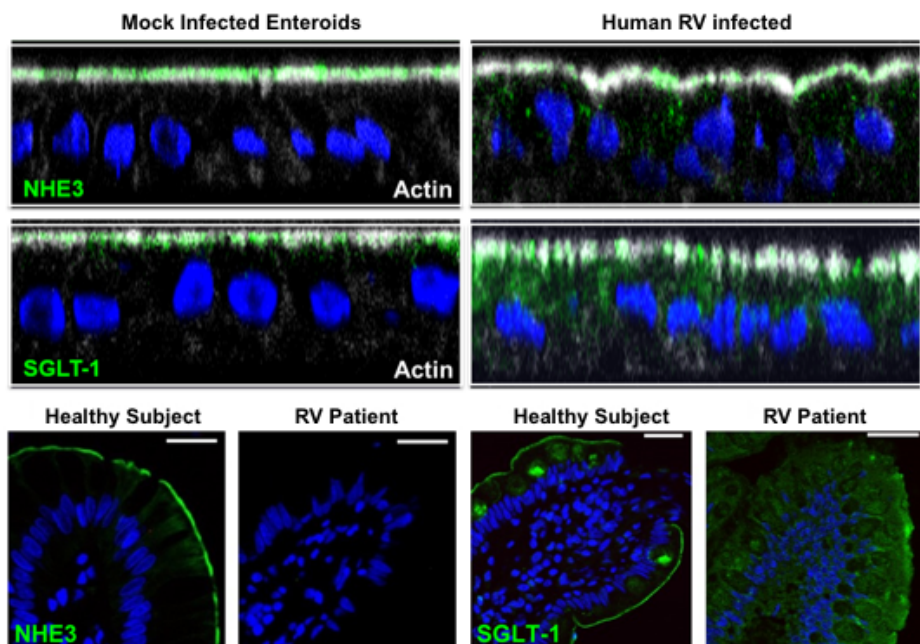

648
